# Supplementary material for: Improvement of the Self-Controlled Hyperthermia Applications by Varying Gadolinium Doping in Lanthanum Strontium Manganite Nanoparticles
Source: MDPI journal article supplement (doi:10.3390/molecules28237860), 2023-11-30

## Supplementary Materials

# Improvement of the Self-Controlled Hyperthermia Applications by Varying Gadolinium Doping in Lanthanum Strontium Manganite Nanoparticles

Ashfaq Ahmad <sup>1,†</sup>, Hassan Akbar <sup>2,3,†</sup>, Imran Zada <sup>1</sup>, Faiza Anjum <sup>4</sup>, Amir Muhammad Afzal <sup>5</sup>, Subhan Javed <sup>4</sup>, Muhammad Muneeb <sup>4</sup>, Asghar Ali <sup>4,\*</sup> and Jeong Ryeol Choi <sup>6,\*</sup>

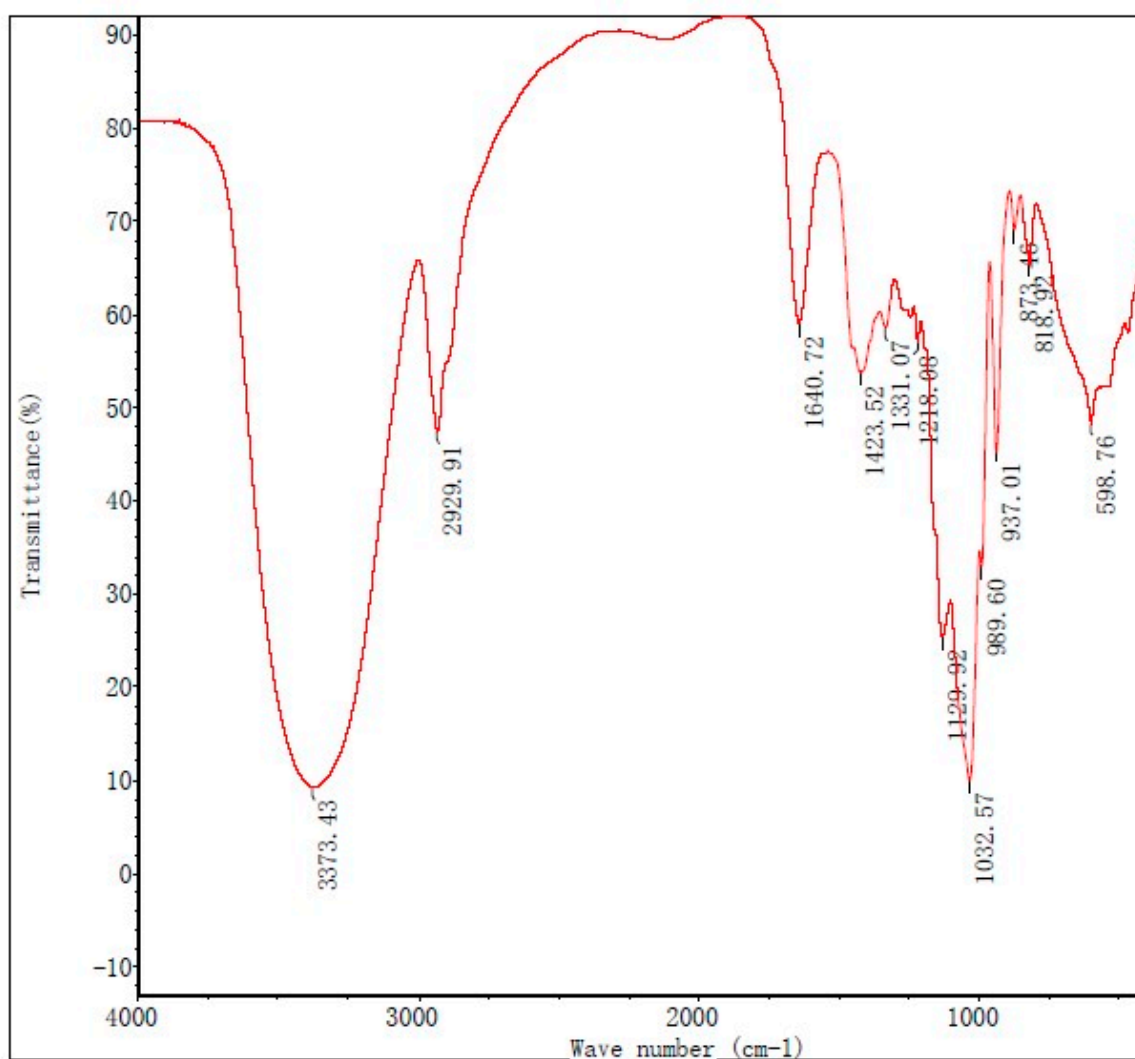

Infrared spectrum results

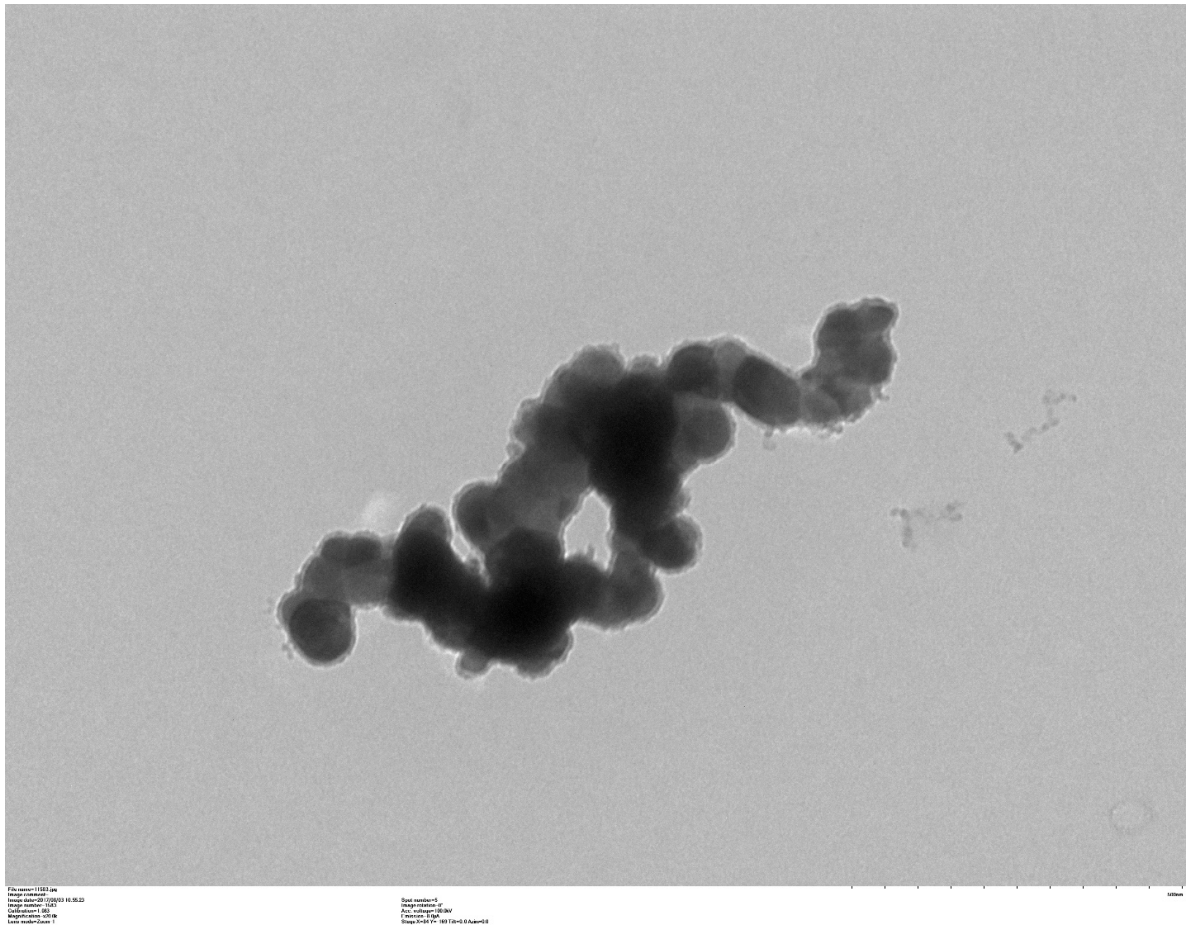

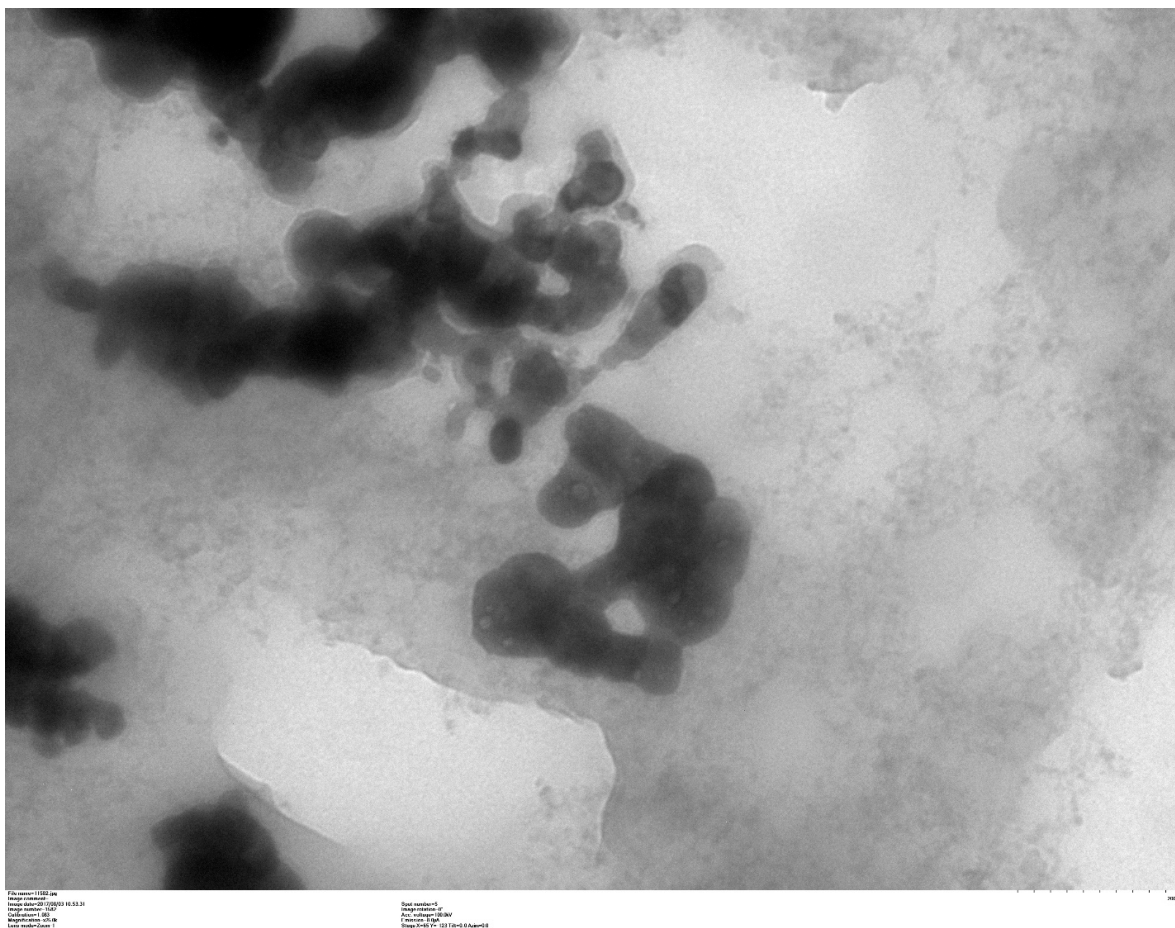

TEM images of the  $\text{La}_{1-x-y}\text{Sr}_x\text{Gd}_y\text{MnO}_3$  nanoparticles

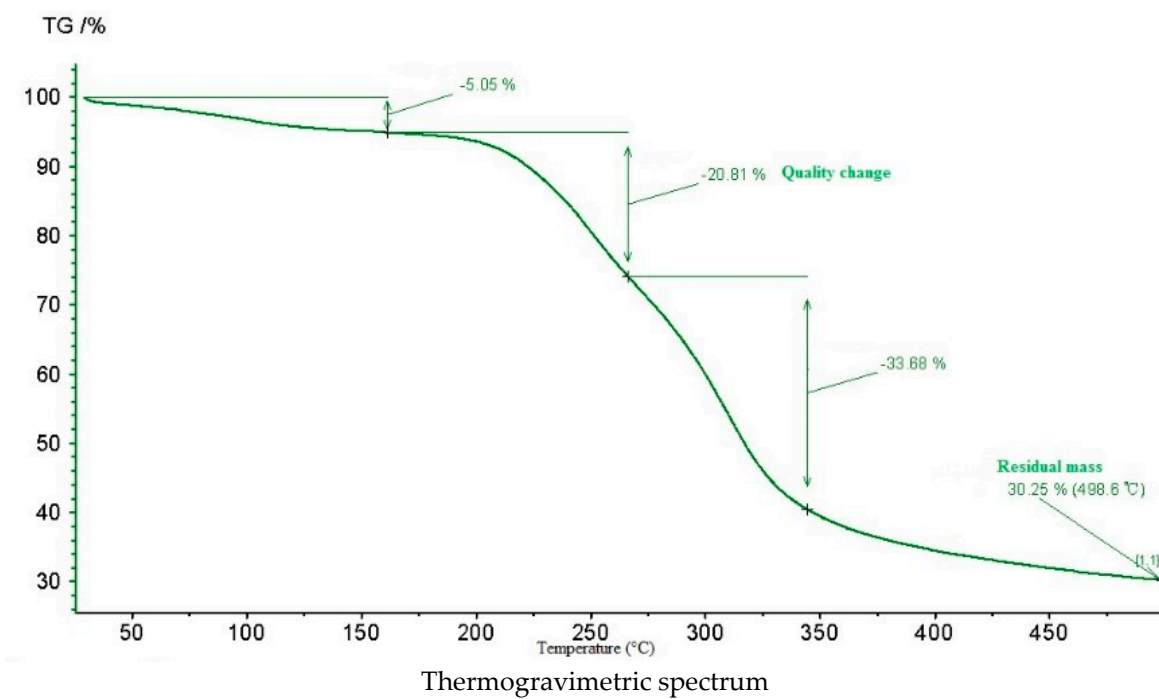

Supplement: s1 [file s1]
